# Supplementary material
Source: PubMed Central journal article supplement (PMC2719689)

## Supplemental Materials and Methods

**Cell culture.** MCF-10A cells were cultured in DMEM/F12 medium supplemented with 5% horse donor serum. To generate inducible LacZ-knockdown cell lines, pBabe-H1-siLacZ was transfected into MCF7 (MCF7-TR-7) or RKO (RKO-TR-13) cells and the inducible expression of siRNA against LacZ was confirmed by the reduced expression of HA-tagged LacZ in cells transfected with pcDNA3-HA-LacZ.

**Plasmids.** Ha-tagged LacZ cDNA (GenBank #BC112941) was amplified by PCR from an *E.coli* with forward primer, 5'-AAGCTT ACC ATG tac cca tac gac gta cca gat tac gct GAG TTC CTG CAC TGG ATG G -3', and reverse primer, 5'- CTC GAGTTA TTT TTG ACA CCA GAC CAA C -3'. The HA-tagged LacZ cDNA was then cloned into pcDNA3 and used for transient LacZ expression.

To generate a construct that expresses a siRNA against LacZ under the control of the tetracycline-regulated H1 promoter, two 64-base oligos were annealed and then cloned into pBabe-H1 siRNA expression vector, and the resulting plasmid designed pBabe-H1-siLacZ. The sense oligo is 5'-GAT CCC CTT TAA CCG CCA GTC AGG CTT TCA AGA GAA GCC TGA CTG GCG GTT AAA TTT TTG GAA A -3', and the antisense oligo is 5'-AGC TTT TCC AAA AAT TTA ACC GCC AGT CAG GCT TCT CTT GAA AGC CTG ACT GGC GGT TAA AGG G-3'.

**Double-strand siRNA sequence.** The scrambled double-strand siRNA sequence used in supplemental Fig. 3 is GCA GUG UCU CCA CGU ACU A. The double-strand siRNA sequence against GPR87 is GCA UCU UGC UGA AUG GUU U.

**Antibodies.** Anti-p-AKT (Ser-473) and anti-AKT were purchased from Cell Signaling.

## Supplemental Figure Legends

**Supplementary Figure 1.** Knockdown of LacZ has no effect on GPR87 expression and cell growth. (A) Left panel: generation of RKO and MCF7 cell lines that inducibly express a siRNA against LacZ. The expression of inducible siRNA against LacZ was confirmed by reduced expression of HA-tagged LacZ in cells transfected with pcDNA3-HA-LacZ. Right panel: the levels of GPR87 transcripts was examined in RKO and MCF7 cells uninduced or induced to express a siRNA against LacZ for 72 h. (B) Colony formation assays were performed with RKO (left panel) and MCF7 (right panel) cells uninduced (control) or induced (LacZ-KD) to express a siRNA against LacZ along with mock-treatment (Ctrl) or treatment with 10 ng/mL of doxorubicin or treatment with 10 nM of camptothecin (CPT) over a 14-day period. (C) Western blot analysis was performed to measure the level of p53 in RKO and MCF7 cells uninduced (-) or induced (+) to express a siRNA against LacZ for 72 h, followed by mock-treatment (Ctrl) or treatment with 250 ng/mL of doxorubicin (Dox) or 250 nM camptothecin (CPT) for 24 h. GAPDH was used as loading control.

**Supplementary Figure 2.** The effect of GPR87-knockdown on cell proliferation is not cell type-specific. (A) RT-PCR was performed to measure the levels of GPR87 transcripts in GPR87-knockdown MCF7 cells (clone #43) upon induction of siRNA for 3 days. (B) GPR87 knockdown enhances DNA damage-induced growth inhibition. Left panel: colony formation assay was performed with MCF7 cells (clone #43), which were uninduced (control) or induced (GPR87-KD) to express siRNA against GPR87 along with mock-treatment (Ctrl) or treatment with 10 ng/mL of doxorubicin (Dox) or 10 nM camptothecin (CPT), and then cultured over a 14-day period. Right panel: the average number of colonies for each treatment condition was calculated from three separate experiments. (C) Western blots were prepared using extracts from

MCF7 cells that were uninduced (-) or induced (+) to knock down GPR87 for 3 d, followed by mock-treatment (Ctrl) or treatment with 250 ng/mL of doxorubicin (Dox) or 250 nM camptothecin (CPT) for 24 h. The blots were probed with antibodies against p53, p21, Mdm2, PARP, and actin, respectively.

**Supplementary Figure 3.** GPR87 knockdown enhances DNA damage-induced p53 activation and induction of p21 in immortalized MCF10A cells. (A) MCF-10A cells were transiently transfected with scramble siRNA or siRNA against GPR87 for 3 days along with mock-treatment or treatment with 250 ng/mL of doxorubicin (Dox) for 24 h. The level of GPR87 transcripts was measured by RT-PCR. (B) Western blots were prepared using extracts from MCF-10A cells that were transiently transfected with scramble siRNA or siRNA against GPR87 for 3 d, followed by mock-treatment (Ctrl) or treatment with 250 ng/mL of doxorubicin (Dox) or 250 nM camptothecin (CPT) for 24 h. The blots were probed with antibodies against p53, p21, and GAPDH, respectively.

**Supplementary Figure 4.** DNA damage-induced Akt activation is inhibited by GPR87 knockdown. Western blots were prepared with extracts from RKO cells that were uninduced (-) or induced (+) to knock down GPR87 for 3 d, followed by mock-treatment or treatment with 250 ng/mL of doxorubicin (Dox) for 5-30 min. The blots were probed with antibodies against AKT, phosphorylated AKT, and GAPDH, respectively.

# Supplementary Figure 1

**A**

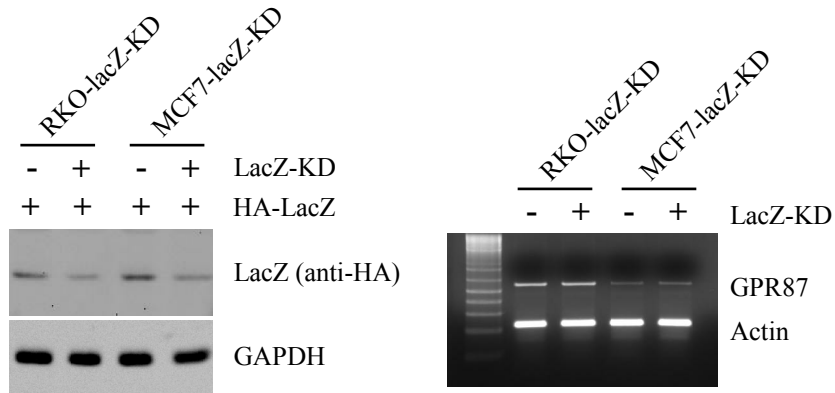

**B**

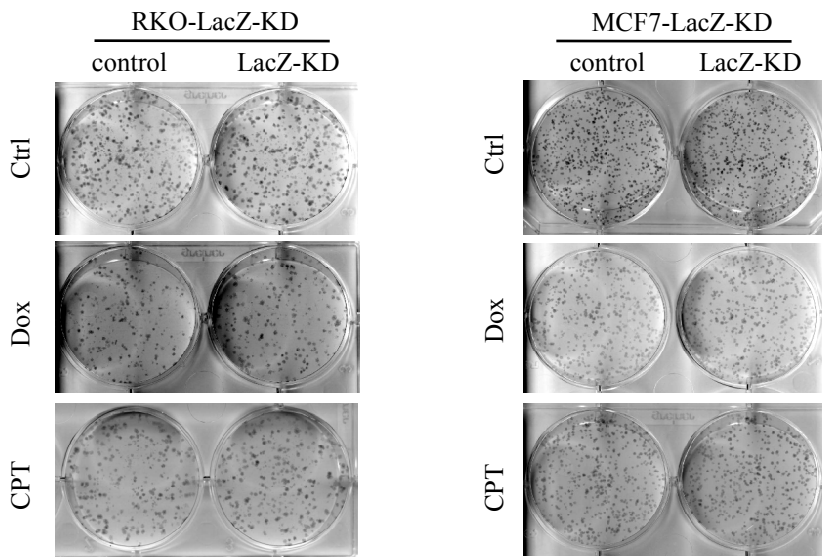

**C**

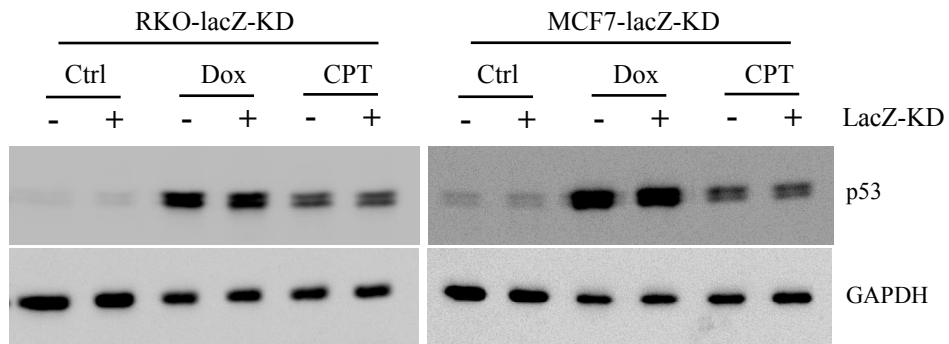

## Supplementary Figure 2

**A**

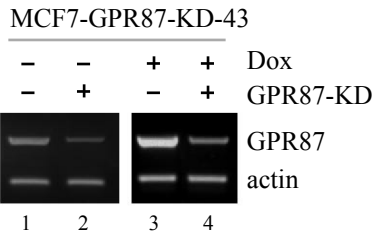

**B**

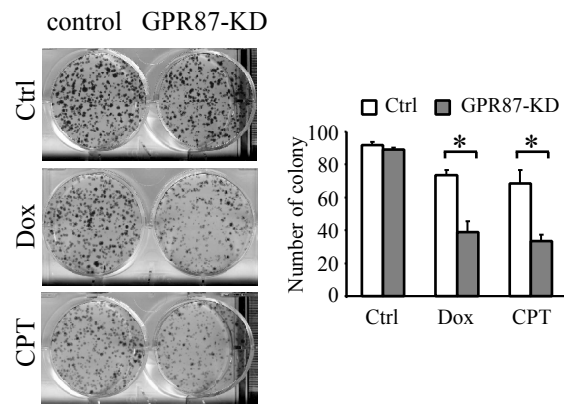

**C**

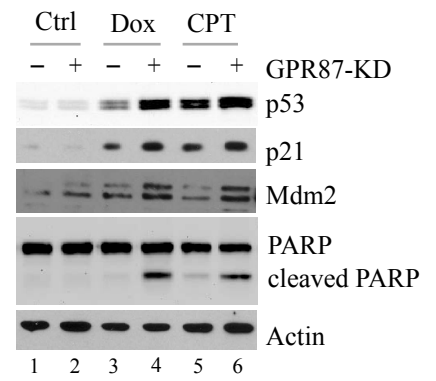

### Supplementary Figure 3

**A**

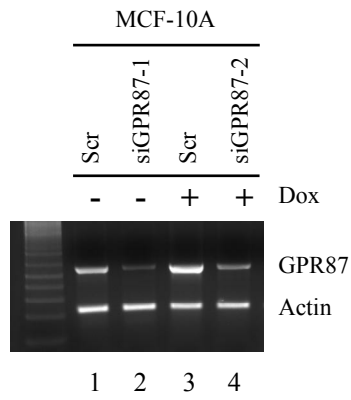

**B**

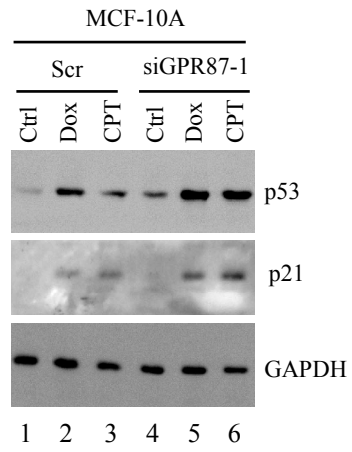

## Supplementary Figure 4

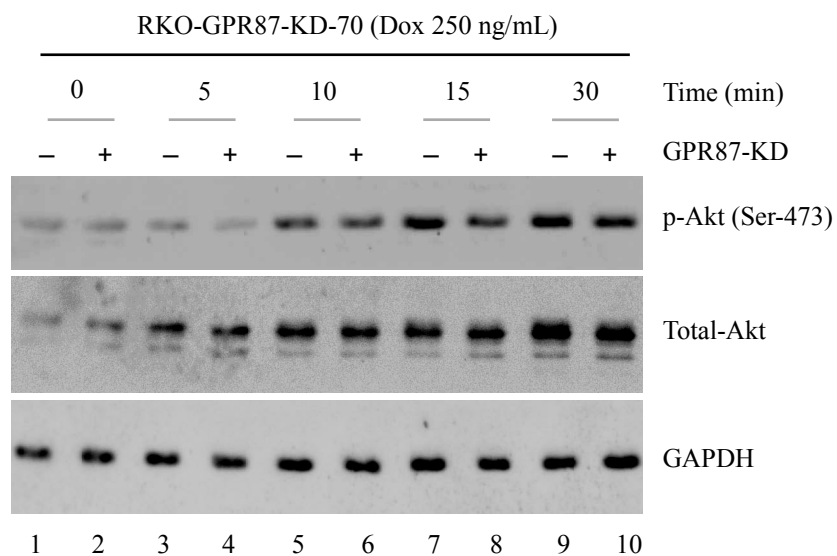

Supplement: NIHMS121968-supplement-1.pdf [file NIHMS121968-supplement-1.pdf]
